# Supplementary material for: Aerosol optical properties within the atmospheric boundary layer predicted from ground-based observations compared to Raman lidar retrievals during RITA-2021
Source: Copernicus journal article supplement (doi:10.5194/egusphere-2023-2262), 2023-12-13
Supplement: Supplementary file [file egusphere-2023-2262-AC1-supplement.pdf]

1 Response to referees for manuscript “Aerosol optical properties within the atmospheric  
2 boundary layer predicted from ground-based observations compared to Raman lidar retrievals  
3 during RITA-202” by Xinya Liu, Diego Alves Gouveia, Bas Henzing, Arnoud Apituley, Arjan  
4 Hensen, Danielle van Dinther, Rujin Huang, and Ulrike Dusek. (manuscript ID: EGUSPHERE-  
5 2023-2262)

6 Referee #2 comments:

7 The authors present a comparison of backscatter and extinction coefficients as inferred from  
8 ground-based in-situ measurements and lidar observations. The manuscripts describe the steps  
9 taken to convert in-situ measurements to optical properties and shows findings for a five-month  
10 measurement campaign in 2021. Given these specifics, the manuscript would potentially  
11 qualify as a Measurement Report. However, I don't find the work to be within the scope of  
12 ACP and there are several issues that lead me to recommend rejection:

13 1. The authors fail to motivate why the scientific community should be interested in this work.  
14 Will the method be applied in future analyses of CAELI observations? Can it be adapted to  
15 other sites? How is it superior to the traditional approach of just assuming a lidar ratio?

16 In response to the referee’s feedback regarding the motivation behind our work, we have  
17 taken steps to more clearly state the significance and relevance of our study in the revised  
18 manuscript, particularly in the abstract. Here, we wish to emphasize several key points why  
19 such a study is interesting and worthwhile:

20 a. **Novelty:** The methodology developed in this study provides a valuable approach  
21 for obtaining vertical profiles of the lidar ratio through in situ measurements and  
22 readily accessible ECMWF meteorological data. This is particularly valuable for  
23 atmospheric research sites lacking advanced lidar techniques. We show that for  
24 realistic aerosol size distributions the lidar ratio is rather insensitive to relative  
25 humidity and can be used to evaluate typical lidar ratio assumptions more  
26 quantitatively.

27 b. **Integration:** Our research contributes significantly to bridging the gap between in  
28 situ measurements and remote sensing lidar observations. The methodology  
29 provides a good connection from the ground to the lowest lidar profiles, effectively  
30 helping solve the overlap issues that are often a challenge in lidar systems.

31 c. **Broad Applicability:** One of the key advantages of our approach is its only reliance  
32 on routine in situ measurements to derive aerosol vertical optical properties. This  
33 principle is applicable to other sites. As part of our future research efforts, we aim  
34 to collect and analyse data from additional sites to conduct broader and more  
35 comprehensive studies.

36 d. **Validation:** While our primary aim was not to apply this method directly to CAELI  
37 observations, it nevertheless offers a significant reference values for validating  
38 observations made by CAELI or similar instruments.

39 Moreover, while the literature suggests that traditional methods can provide reasonably  
40 reliable lidar ratio values, the effectiveness of these traditional approaches is inherently  
41 limited to sites equipped with Raman lidar measurement capabilities. This limitation is a  
42 significant constraint, as not all atmospheric research sites possess such advanced  
43 instrumentation. Our methodology offers a valuable alternative for deriving lidar ratio  
44 through conventional in situ measurements, significantly broadening the applicability of  
45 aerosol research to sites without advanced lidar technology.

46 2. The presentation is rather unfocussed with an additional 42 figures in the supplement. The  
47 authors also mention instruments like the microwave radiometer and the ceilometer that are  
48 not really used later in the work. I suggest to identify key messages and trim the  
49 presentation accordingly.

50 We have undertaken a thorough revision of our manuscript to address this issue. We have  
51 now put some key information from the appendix to the main text, ensuring that the most  
52 critical data and findings are readily accessible. Additional detailed profiles and  
53 supplementary data (previously Figure S21-42) have been relocated to a publicly accessible  
54 repository (<https://doi.org/10.5281/zenodo.11174465>), providing an opportunity for  
55 interested readers to explore this information further.

56 Furthermore, we have clarified the role of the ceilometer in our study, specifically its utility  
57 in identifying boundary layer heights, which is mentioned on line 193-195 in the revised  
58 manuscript.

59 While the microwave radiometer data were not a primary focus of our investigation, the  
60 meteorological data, particularly relative humidity measurements, play a crucial role in our  
61 research. These data were incorporated for comparison purposes, underscoring that  
62 ultimately, utilizing data from ECMWF is a superior choice, which also broadens the  
63 applicability of our model. However, in the revised version of the manuscript, we have  
64 chosen to retain only 3 profiles (Figure 6-8) to avoid overwhelming the readers with  
65 excessive detail.

66 3. The presented measurements seem to be quite specific focussing almost exclusively on  
67 clean conditions. It would have been nice if there had been an effort to put the aerosol  
68 conditions during RITA into a long-term perspective, e.g., using long-term sun-photometer  
69 measurements.

70 In our original manuscript, we discussed two relatively polluted cases and two clean cases  
71 to present a balanced view of aerosol conditions. In the revised version, we continue to  
72 showcase results under both polluted (originating from the continent, 1<sup>st</sup> case and 2<sup>nd</sup> case)  
73 and clean conditions (originating from the ocean, 3<sup>rd</sup> case). While the pollution levels in  
74 these cases might seem mild when compared to the more heavily polluted regions globally,  
75 they are representative of the pollution encountered in the Netherlands. This is  
76 demonstrated in Figure R1. The boxplots below compare PM<sub>2.5</sub> concentrations from May  
77 to October 2021 to the conditions encountered during the two RITA campaign periods  
78 (Figure R1(b)) and the lidar case studies (Figure R1(c)). The cases discussed in the  
79 manuscript are indicated by dashed grey lines.

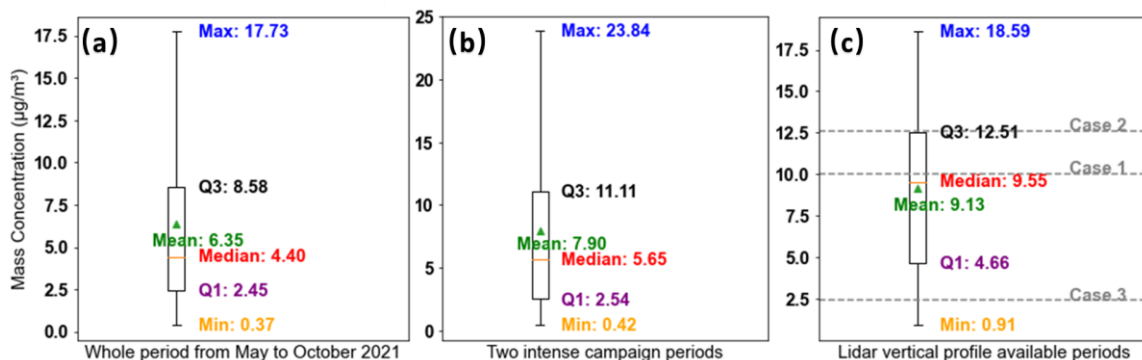

80

81 Figure R1: Boxplot of PM<sub>2.5</sub> mass concentration (a) during the entire period from May to  
82 October 2021 with outliers excluded; (b) Two intensive campaign periods (11<sup>th</sup> May - 24<sup>th</sup>  
83 May and 16<sup>th</sup> September - 12<sup>th</sup> October) with outliers excluded; (c) lidar vertical profile

84 available periods with all data included. The three gray dashed lines represent the mass  
85 concentrations for the three cases discussed in the revised manuscript.

86 Among all the lidar measurement periods, there was only one case where considerably  
87 higher pollution values were recorded at the surface than in case 1 and 2, namely  $18.6 \mu\text{g}$   
88  $\text{m}^{-3}$  as shown in Figure R1(c). This corresponds to the profiles showing below in Figure R2.  
89 However, the layer above 1 km was very clean, and only a very small region with a valid  
90 lidar ratio retrieval was available, therefore we did not focus on this case. However, within  
91 the small region, predicted and retrieved lidar ratio agreed well. This case further  
92 underscores the benefits of using in situ measurements to validate the reliability and  
93 accuracy of lidar observations.

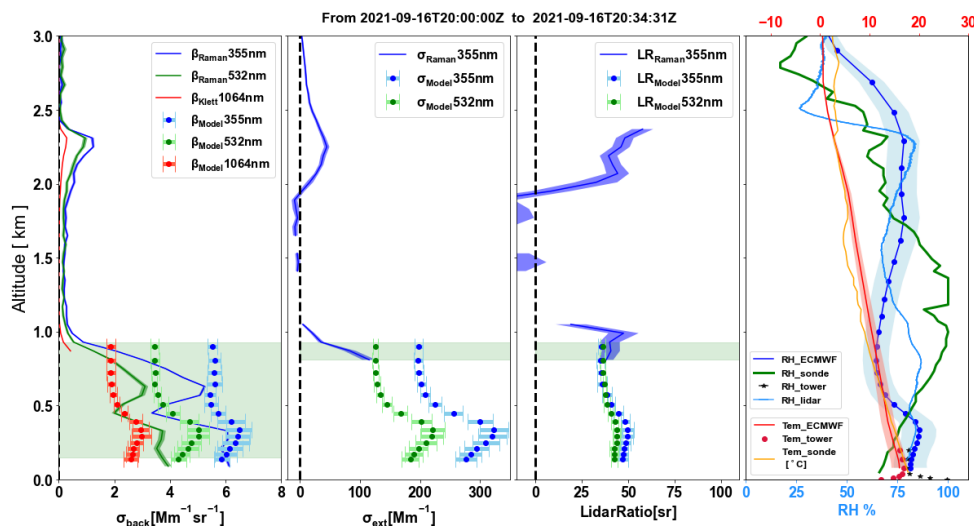

94  
95 Figure R2: Profiles from 20:00 to 20:34 at UTC time on 2021-09-16.

96 Regarding the incorporation of long-term measurements to provide a broader perspective  
97 on aerosol conditions during the RITA campaign, we acknowledge the value of such an  
98 analysis. However, the availability of sun-photometer measurements during the RITA-  
99 2021 campaign period was very limited, which constrained our ability to conduct a more  
100 extended analysis. Despite this limitation, integrating long-term data into our research is  
101 indeed part of our future plans.

102 4. The authors admit that coarse-mode aerosols have a large impact on the scattering  
103 calculations. While this is somewhat minimised by the clean conditions considered in their  
104 work, it is likely to be of huge importance during other conditions. In that context, it would  
105 have been nice to get some long-term perspective on the occurrence of coarse-mode  
106 aerosols. The authors should also mention that Mie theory is inadequate to infer optical  
107 properties of dust particles.

108 In our study the mass fraction of coarse mode ( $\text{PM}_{2.5-10}$ ) vs  $\text{PM}_{10}$  aerosols was about 49%  
109 on average, ranging from 14% to 81% during the two RITA campaign periods (11<sup>th</sup> May -  
110 24<sup>th</sup> May and 16<sup>th</sup> September - 12<sup>th</sup> October in 2021). This is in line with previous longer-  
111 term measurements of  $\text{PM}_{2.5}$  represented 50 % of the  $\text{PM}_{10}$  mass fraction at Cabauw from  
112 September 2007 to October 2008 (Mensah et al., 2012). The coarse mode accounted for  
113 about 13% of the total light scattering on average (ranging from 0.05% to 94.5%) in our  
114 study. Under these conditions, our method can still provide reasonably accurate lidar ratio  
115 predictions even in the absence of specific chemical composition data for coarse-mode  
116 particles, as long as the size distribution of the coarse mode is known. Although in  
117 individual cases, there are sometimes significant differences in predicted and retrieved lidar

118 ratios in the original manuscript (as the dates are indicated in the Figure R3(a) below), we  
 119 found the coarse mode mass fraction was about 10% to 20% during these specific cases, so  
 120 the difference were not due to the coarse mode. In fact, the comparison has been improved  
 121 when we applied the overlap correction function to our retrieved data (Figure R3(b)) in the  
 122 revised manuscript. This suggests that in our study, the mismatches between the model and  
 123 the lidar measurement were seldom due to coarse mode but rather to the lack of overlap  
 124 correction.  
 125 This is a significant result and we aim to apply this method at other sites and conduct long-  
 126 term studies in the future to provide a more comprehensive understanding of aerosol  
 127 conditions, for which this applies. We expect at more inland sites this result might still be  
 128 valid, even if the coarse mode makes up a bigger mass fraction, because the chemical  
 129 composition is typically much less variable than the extreme cases (pure sea salt vs pure  
 130 mineral dust) we consider for the Cabauw site that is sometimes considerably influenced  
 131 by marine air masses.  
 132 We acknowledge the limitations of Mie theory in accurately predicting the optical  
 133 properties of non-spherical dust particles. This limitation is an important consideration in  
 134 future research, especially in regions where dust plays a significant role in atmospheric  
 135 aerosol composition.

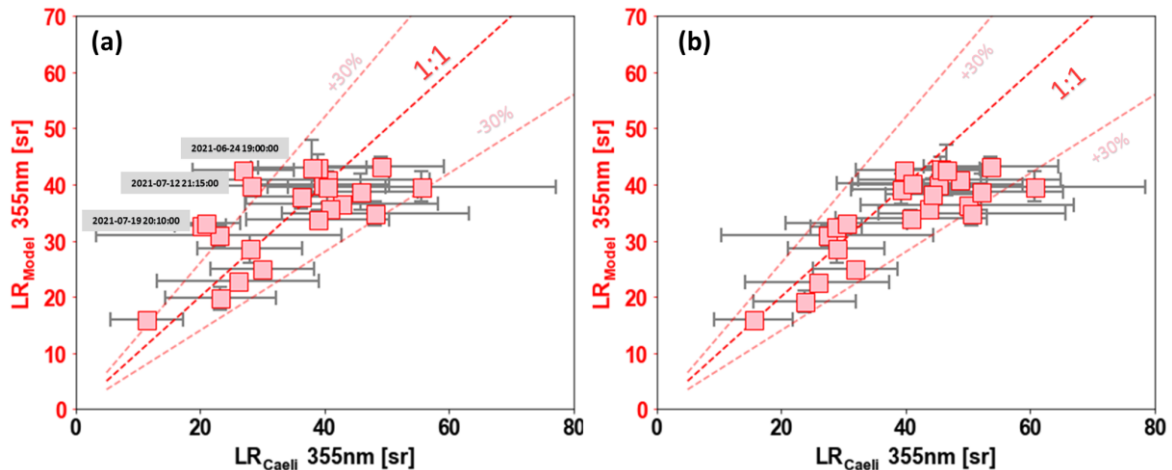

136  
 137 Figure R3: Scatter plot of the lidar ratios from Raman lidar measurements (x axis) (a)  
 138 original data (b) new data with overlap correction applied, and from calculations (y axis) at  
 139 355 nm.

140 5. The optical profiles inferred from the ground-based in-situ measurements all look like  
 141 scaled versions of the RH profile. This is not surprising as only RH might give some insight  
 142 on vertical variation and the authors assume aerosol conditions to be constant with height.  
 143 It doesn't seem fair that any discrepancies between measured and modelled optical  
 144 properties are then attributed to errors in the RH profile. The authors should rather find a  
 145 way to identify a maximum height up to which the vertical extension of ground-based in-  
 146 situ measurements can give meaningful results. High-resolution sounding profiles could be  
 147 a source for such an assessment and I wouldn't assume any connection between the ground  
 148 and above the first inversion - particularly later in the year.

149 In our methodology and results, relative humidity (RH) indeed plays a significant role in  
 150 the outcomes of the vertical profiles. However, as stated in our original manuscript,  
 151 discrepancies between the model and lidar measurements are not solely attributed to  
 152 variations in RH. Other factors, such as different aerosol layering (line 439-441) and  
 153 aerosol shape effects (line 426-429 and line 463-466), can also significantly contribute to  
 154 overestimation or underestimation of the backscatter and extinction profiles. Indeed, these  
 155 extensive aerosol properties are not directly predicable from ground-based measurements

156 above the mixed layer. Nonetheless, an intensive property, such as the lidar ratio is still  
157 comparable between retrievals at around 1 km and the ground, if that height is within the  
158 boundary layer or residual layer.

159 The maximum height up to which the vertical extension of ground-based in-situ  
160 measurements (in particular the lidar ratio) can yield meaningful results was determined  
161 based on ceilometer data, as described in the original text (line 194-196). In the revised  
162 version of our manuscript, we have emphasized this point (line 193-195) to clarify the basis  
163 our methodology.

164 6. The authors overstate their findings. They state "a representative lidar ratio can be estimated  
165 based on ground-based in-situ measurements". However, the presented results give the  
166 impression that they are by no way superior to an analysis by an average lidar operator. The  
167 suitability furthermore hinges on the assumption of vertical homogeneity which - though  
168 not unreasonable - should still be supported by some form of measurement. They continue  
169 "This allows to extend extinction profiles to lower altitudes, where they cannot be retrieved,  
170 or for use with simple elastic backscatter lidar to derive extinction profiles." Again, lidar  
171 operators have been doing pretty well with assuming lidar ratios based on experience. The  
172 authors would need to be more specific to support their statement. And conclude "The  
173 proposed method could be further applied to predict aerosol optical depth and also might  
174 be beneficial for large-scale or global radiation simulations." It is quite customary to simply  
175 assume constant lidar extinction coefficients from the lowermost trustworthy measurement  
176 height to the surface. This approach generally shows good agreement to Sun-photometer  
177 observations of aerosol optical depth. This approach also assumes vertically homogeneous  
178 aerosol conditions but is much more straightforward than the authors' work.

179 In addition to the points highlighted in response 1, we wish to reiterate the significant  
180 contribution of our research to the atmospheric science community.

181 Our study effectively bridges the gap between in situ measurements and remote sensing  
182 lidar observations, addressing a notable gap in the literature where few studies have  
183 integrated these two independent methodologies for vertical aerosol profiling.

184 Our approach extends beyond the conventional column-integrated optical depth (Sun-  
185 photometer observations) closure to provide a broad exploration of vertical aerosol profiles.  
186 This allows for a deeper understanding of aerosol optical properties across different  
187 atmospheric layers.

188 Additionally, we believe that science should embrace multiple perspectives rather than be  
189 confined to or satisfied with a single methodology. By integrating different methodologies  
190 and independently verifying the results, we can improve reliability of our measurements.

191 In conclusion, we believe that the integration of in situ and remote sensing measurements  
192 is definitely worthwhile, offering a more accurate assessment of aerosol optical properties  
193 and their spatial distribution. This methodological innovation aligns with ACP's scope of  
194 enhancing our understanding of the atmosphere's composition and its broader impacts.

195 7. The choice of references regarding the lidar technique in general and lidar ratios in  
196 particular is quite unusual. I suggest to consult with the corresponding co-authors to find  
197 more suitable references.

198 We have consulted with our co-authors and have revised our reference list (line 45-59) to  
199 include more appropriate and widely recognized sources in the field.

200 References:

201 Mensah, A. A., Holzinger, R., Otjes, R., Trimborn, A., Mentel, T. F., Ten Brink, H.,  
202 Henzing, B., and Kiendler-Scharr, A.: Aerosol chemical composition at Cabauw, the  
203 Netherlands as observed in two intensive periods in May 2008 and March 2009, *Atmos.*  
204 *Chem. Phys.*, 12, 4723–4742, <https://doi.org/10.5194/acp-12-4723-2012>, 2012.

205
